# Supplementary material
Source: publisher figshare collection journal article supplement (https://acs.figshare.com/ndownloader/files/4949272)
Supplement: Supplementary file 1 [file 4949272]

## Supporting Information

### Core-shell chitosan microcapsules for programmed sequential drug release

*Xiu-Lan Yang,<sup>†</sup> Xiao-Jie Ju,<sup>\*,†,‡</sup> Xiao-Ting Mu,<sup>†</sup> Wei Wang,<sup>†</sup> Rui Xie,<sup>†</sup> Zhuang Liu,<sup>†</sup> and Liang-Yin Chu<sup>†,‡</sup>*

<sup>†</sup>School of Chemical Engineering, Sichuan University, Chengdu 610065, P. R. China

<sup>‡</sup>State Key Laboratory of Polymer Materials Engineering, and Collaborative Innovation Center for Biomaterials Science and Technology, Sichuan University, Chengdu 610065, P. R. China

\*Corresponding Author. *E-mail*: juxiaojie@scu.edu.cn

## Supplementary Figures

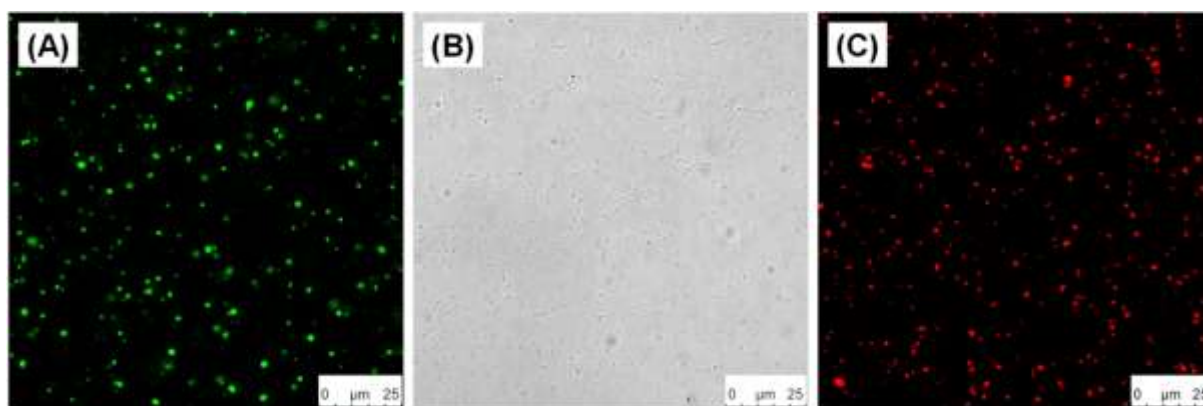

**Figure S1.** CLSM images of Cur-PLGA-NPs (A), C-PLGA-NPs (B) and RhB-PLGA-NPs (C) in soybean oil.

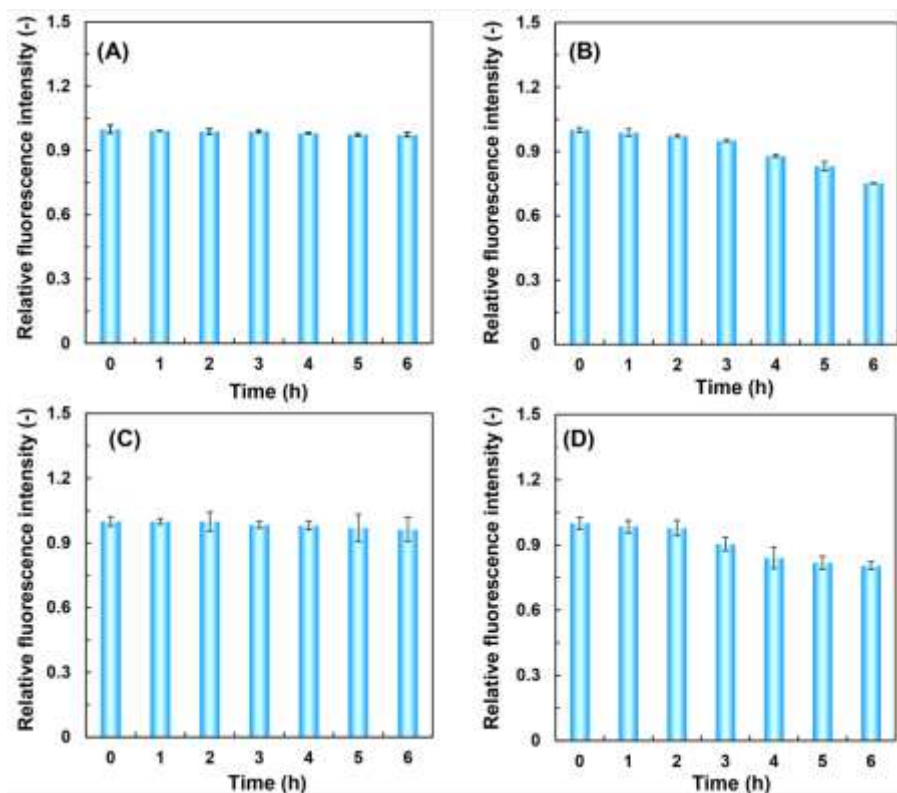

**Figure S2.** Relative fluorescence intensities of the inner core at hourly intervals. (A) Microcapsules containing only free curcumin, (B) microcapsules containing only free RhB, (C) microcapsules containing only Cur-PLGA-NPs, (D) microcapsules containing both free RhB molecules and Cur-PLGA-NPs.

## **Supplementary Movies**

**Movie S1.** The acid-triggered burst-release process of chitosan core-shell microcapsules containing both free curcumin and Cur-PLGA-NPs.

**Movie S2.** The acid-triggered burst-release process of chitosan core-shell microcapsules containing both free RhB and RhB-PLGA-NPs.
